# Supplementary material for: Multi-scale interactions between local hydrography, seabed topography, and community assembly on cold-water coral reefs
Source: Copernicus journal article supplement (doi:10.5194/bg-10-2737-2013), 2013-04-24
Supplement: Supplementary file 1 [file bg-10-2737-2013-supplement.pdf]

| Major group | Species                                                 | Feeding |
|-------------|---------------------------------------------------------|---------|
| Anthozoa    | <i>Actinaria</i> sp.                                    | S       |
| Anthozoa    | <i>Edwardsiella carnea</i> (Gosse, 1856)                | S       |
| Anthozoa    | <i>Parazoanthus anguicomus</i> (Norman, 1868)           | S       |
| Brachiopoda | <i>Eucalathis tuberata</i> (Jeffreys, 1878)             | S       |
| Brachiopoda | <i>Terebratulina retusa</i> (Linnaeus, 1758)            | S       |
| Bryozoa     | <i>Bicellariella ciliata</i> (Linnaeus, 1758)           | S       |
| Bryozoa     | <i>Buskea nitida</i> Heller, 1867                       | S       |
| Bryozoa     | <i>Celleporina caliciformis</i> (Lamouroux, 1816)       | S       |
| Bryozoa     | <i>Chartella barleei</i> (Busk, 1860)                   | S       |
| Bryozoa     | Cheilostomata sp.                                       | S       |
| Bryozoa     | <i>Crisia</i> sp. 1                                     | S       |
| Bryozoa     | <i>Crisia</i> sp. 2                                     | S       |
| Bryozoa     | <i>Diplosolen obelia</i> (Johnston, 1838)               | S       |
| Bryozoa     | <i>Disporella hispida</i> (Fleming, 1828)               | S       |
| Bryozoa     | <i>Escharella octodentata</i> (Hincks, 1880)            | S       |
| Bryozoa     | <i>Idmidronea atlantica</i> (Forbes, in Johnston, 1847) | S       |
| Bryozoa     | <i>Omalosecosa ramulosa</i> (Linnaeus, 1767)            | S       |
| Bryozoa     | <i>Oncousoecia diastoporides</i> (Johnston, 1847)       | S       |
| Bryozoa     | <i>Parasmittina trispinosa</i> (Johnston, 1838)         | S       |
| Bryozoa     | <i>Plagioecia patina</i> (Lamarck, 1816)                | S       |
| Bryozoa     | <i>Porella compressa</i> (J. Sowerby, 1805)             | S       |
| Bryozoa     | <i>Pyriopora catenularia</i> (Fleming, 1828)            | S       |
| Bryozoa     | <i>Reteporella beaniana</i> (King, 1846)                | S       |
| Bryozoa     | <i>Schizomavella hastate</i> (Hincks, 1862)             | S       |
| Bryozoa     | <i>Schizomavella linearis</i> (Hassall, 1841)           | S       |
| Bryozoa     | <i>Scrupocellaria</i> sp.                               | S       |
| Bryozoa     | <i>Smittina crystalline</i> (Norman, 1867)              | S       |
| Bryozoa     | <i>Smittoidea reticulata</i> (MacGillivray, 1842)       | S       |
| Bryozoa     | <i>Tubulipora penicillata</i> (O. Fabricius, 1780)      | S       |
| Crustacea   | Amphipoda sp. 1                                         | D       |
| Crustacea   | Amphipoda sp. 2                                         | D       |
| Crustacea   | Amphipoda sp. 3                                         | D       |
| Crustacea   | Amphipoda sp. 4                                         | D       |
| Crustacea   | Amphipoda sp. 5                                         | D       |
| Crustacea   | <i>Atlantopandalus propinquus</i> (G.O. Sars, 1870)     | D       |
| Crustacea   | Copepoda sp.                                            | D       |
| Crustacea   | Diastylidae sp.                                         | D       |
| Crustacea   | <i>Galathea strigosa</i> (Linnaeus, 1761)               | D       |
| Crustacea   | <i>Gnathia dentata</i> (G.O. Sars, 1872)                | D       |
| Crustacea   | <i>Janira maculosa</i> Leach, 1814                      | D       |
| Crustacea   | <i>Munida sarsi</i> Huus, 1935                          | P       |
| Crustacea   | <i>Munna kroeryi</i> Goodsir, 1842                      | D       |
| Crustacea   | <i>Pagurus forbesii</i> Bell, 1846                      | P       |
| Crustacea   | <i>Pandalina brevirostris</i> (Rathke, 1843)            | P       |
| Crustacea   | <i>Verruca stroemi</i> (O.F. Müller, 1776)              | S       |

|               |                                                              |   |
|---------------|--------------------------------------------------------------|---|
| Crustacea     | <i>Xantho hydrophilus</i> (Herbst, 1790)                     | D |
| Echinodermata | <i>Amphiura chiajei</i> Forbes, 1843                         | D |
| Echinodermata | <i>Echinocyamus pusillus</i> (O.F. Müller, 1776)             | D |
| Echinodermata | <i>Leptometra cf phalangium</i> (Müller, 1841)               | S |
| Echinodermata | <i>Ophiothrix fragilis</i> (Abilgaard, in O.F. Müller, 1789) | S |
| Echinodermata | <i>Ophiura ophiura</i> (Linnaeus, 1758)                      | S |
| Echinodermata | <i>Porania (Porania) pulvillus</i> (O.F. Müller, 1776)       | P |
| Echiura       | <i>Echiura</i> sp.                                           | D |
| Echiura       | <i>Maxmuelleri lankestri</i> (Herdman, 1898)                 | D |
| Entoprocta    | <i>Pedicellina hispida</i> Ryland, 1965                      | S |
| Hydrozoa      | <i>Abietinaria filicula</i> (Ellis and Solander, 1786)       | S |
| Hydrozoa      | Anthoathecata sp. 1                                          | S |
| Hydrozoa      | <i>Campanularia hincksii</i> Alder, 1856                     | S |
| Hydrozoa      | <i>Clytia hemisphaerica</i> (Linnaeus, 1767)                 | S |
| Hydrozoa      | <i>Eudendrium</i> sp. 1                                      | S |
| Hydrozoa      | <i>Eudendrium</i> sp. 2                                      | S |
| Hydrozoa      | <i>Filellum serpens</i> (Hassall, 1848)                      | S |
| Hydrozoa      | <i>Garveia</i> sp.                                           | S |
| Hydrozoa      | <i>Halecium beanie</i> (Johnston, 1838)                      | S |
| Hydrozoa      | <i>Halecium halecinum</i> (Linnaeus, 1758)                   | S |
| Hydrozoa      | <i>Halecium muricatum</i> (Ellis and Solander, 1786)         | S |
| Hydrozoa      | <i>Halecium</i> sp.                                          | S |
| Hydrozoa      | <i>Halecium tenellum</i> Hincks, 1861                        | S |
| Hydrozoa      | <i>Lafoea dumosa</i> (Fleming, 1820)                         | S |
| Hydrozoa      | <i>Lafoeina tenuis</i> Sars, 1874                            | S |
| Hydrozoa      | <i>Modeeria rotunda</i> (Quoy and Gaimard, 1827)             | S |
| Hydrozoa      | <i>Nemertesia antennina</i> (Linnaeus, 1758)                 | S |
| Hydrozoa      | <i>Rosalinda williamsi</i> Totton, 1949                      | S |
| Hydrozoa      | <i>Sertularella gayi</i> (Lamouroux, 1821)                   | S |
| Hydrozoa      | <i>Sertularella polyzonias</i> (Linnaeus, 1758)              | S |
| Hydrozoa      | <i>Sertularella tenella</i> (Alder, 1857)                    | S |
| Hydrozoa      | Tubulariid sp.                                               | S |
| Hydrozoa      | <i>Zanclaea sessilis</i> (Gosse, 1853)                       | S |
| Mollusca      | <i>Abra alba</i> (W. Wood, 1802)                             | S |
| Mollusca      | <i>Alvania beanii</i> (Hanley in Thorpe, 1844)               | D |
| Mollusca      | <i>Anomia ehippium</i> Linnaeus, 1758                        | S |
| Mollusca      | <i>Astarte sulcata</i> (da Costa, 1778)                      | S |
| Mollusca      | <i>Donax vittatus</i> (da Costa, 1778)                       | S |
| Mollusca      | <i>Emarginula fissura</i> (Linnaeus, 1758)                   | D |
| Mollusca      | <i>Heteranomia squamula</i> (Linnaeus, 1758)                 | S |
| Mollusca      | <i>Hiatella arctica</i> (Linnaeus, 1767)                     | S |
| Mollusca      | <i>Kellia suborbicularis</i> (Montagu, 1803)                 | S |
| Mollusca      | <i>Leptoplana tremellaris</i> (O.F. Müller, 1773)            | P |
| Mollusca      | <i>Modiolus phaseolina</i> (Philippa, 1844)                  | S |
| Mollusca      | <i>Monia patelliformis</i> (Linnaeus, 1767)                  | S |
| Mollusca      | <i>Palliolum striatum</i> (O.F. Müller, 1776)                | S |

|            |                                                  |    |
|------------|--------------------------------------------------|----|
| Mollusca   | <i>Parvicardium cf scabrum</i> (Philippi, 1844)  | S  |
| Nematoda   | Nematoda sp. 1                                   | P* |
| Nematoda   | Nematoda sp. 2                                   | P* |
| Nematoda   | Nematoda sp. 3                                   | P* |
| Nematoda   | Nematoda sp. 4                                   | P* |
| Nematoda   | Nematoda sp. 5                                   | P* |
| Nemertea   | Nemertea sp. 1                                   | P  |
| Nemertea   | Nemertea sp. 2                                   | P  |
| Polychaeta | <i>Acanthicolepis asperimma</i> (M. Sars, 1861)  | P  |
| Polychaeta | <i>Alentia gelatinosa</i> (M. Sars, 1835)        | P  |
| Polychaeta | <i>Amaeana trilobata</i> (Sars, 1863)            | P  |
| Polychaeta | Ampharetidae sp. 1                               | D  |
| Polychaeta | Ampharetidae sp. 2                               | D  |
| Polychaeta | <i>Branchiomma bombyx</i> (Dalyell, 1853)        | S  |
| Polychaeta | cf <i>Abyssoninoe hibernica</i> (McIntosh, 1903) | P  |
| Polychaeta | cf <i>Euclymene</i> sp. 1                        | D  |
| Polychaeta | cf <i>Sabella discifera</i> Grube, 1874          | S  |
| Polychaeta | <i>Chaetopterus</i> sp. 1                        | S  |
| Polychaeta | <i>Chaetopterus variopedatus</i> (Renier, 1804)  | S  |
| Polychaeta | Cirratulidae sp.                                 | D  |
| Polychaeta | Dorvilleidae sp.                                 | P  |
| Polychaeta | Ephrosinidae sp.                                 | P  |
| Polychaeta | <i>Euchone</i> sp.                               | S  |
| Polychaeta | <i>Eulalia bilineata</i> (Johnston, 1840)        | P  |
| Polychaeta | <i>Eunice norvegica</i> (Linnaeus, 1767)         | P  |
| Polychaeta | Flabelligeridae sp.                              | D  |
| Polychaeta | <i>Glycera lapidum</i> Quatrefages, 1866         | P  |
| Polychaeta | Glyceridae sp.                                   | P  |
| Polychaeta | Goniadidae sp.                                   | P  |
| Polychaeta | Hesionidae sp.                                   | P  |
| Polychaeta | <i>Hydroides norvegicus</i> Gunnerus, 1768       | S  |
| Polychaeta | <i>Laonice bahusiensis</i> Söderström, 1920      | S  |
| Polychaeta | <i>Lepidonotus squamatus</i> (Linnaeus, 1758)    | P  |
| Polychaeta | Lumbrineridae sp.                                | D  |
| Polychaeta | Maldanidae sp.                                   | D  |
| Polychaeta | <i>Nereimyra punctata</i> (Müller, 1788)         | P  |
| Polychaeta | <i>Notomastus</i> sp. 1                          | D  |
| Polychaeta | <i>Notomastus</i> sp. 2                          | P  |
| Polychaeta | <i>Notophyllum foliosum</i> (Sars, 1835)         | P  |
| Polychaeta | Pectinaridae sp.                                 | S  |
| Polychaeta | <i>Pholoe inornata</i> Johnston, 1839            | P  |
| Polychaeta | Pholoidae sp.                                    | D  |
| Polychaeta | Phyllodocidae sp.                                | D  |
| Polychaeta | <i>Placostegus tridentatus</i> (Fabricius, 1779) | S  |
| Polychaeta | Polychaeta sp.                                   | U  |
| Polychaeta | <i>Polycirrus</i> sp.                            | D  |

|            |                                                                    |   |
|------------|--------------------------------------------------------------------|---|
| Polychaeta | Polynoidae sp. 1                                                   | P |
| Polychaeta | Polynoidae sp. 2                                                   | P |
| Polychaeta | Polynoidae sp. 3                                                   | P |
| Polychaeta | Polynoidae sp. 4                                                   | P |
| Polychaeta | Polynoidae sp. 5                                                   | P |
| Polychaeta | <i>Pomatoceros</i> sp.                                             | S |
| Polychaeta | <i>Pseudopotamilla reniformis</i> (Bruguière, 1789)                | S |
| Polychaeta | Sabellidae sp. 1                                                   | S |
| Polychaeta | Sabellidae sp. 2                                                   | S |
| Polychaeta | <i>Serpula</i> cf <i>planorbis</i> (Southward, 1963)               | S |
| Polychaeta | <i>Serpula vermicularis</i> Linnaeus, 1767                         | S |
| Polychaeta | Serpulidae sp.                                                     | S |
| Polychaeta | Sigalonidae sp.                                                    | P |
| Polychaeta | <i>Sphaerosyllis</i> sp.                                           | P |
| Polychaeta | Spionidae sp. 1                                                    | P |
| Polychaeta | Spionidae sp. 2                                                    | P |
| Polychaeta | <i>Spirobranchus</i> sp. 1                                         | S |
| Polychaeta | <i>Spirobranchus</i> sp. 2                                         | S |
| Polychaeta | Spirorbidae sp.                                                    | P |
| Polychaeta | Syllidae sp. 1                                                     | P |
| Polychaeta | Syllidae sp. 2                                                     | P |
| Polychaeta | Syllidae sp. 3                                                     | P |
| Polychaeta | Terebellidae sp.                                                   | S |
| Polychaeta | <i>Terebellides</i> sp.                                            | S |
| Polychaeta | <i>Terebellides stroemi</i> Sars, 1835                             | S |
| Polychaeta | <i>Trypanosyllis (Trypanosyllis) coeliaca</i> Claparède, 1868      | P |
| Polychaeta | <i>Trypanosyllis zebra</i> (Grube, 1840)                           | P |
| Priapulida | <i>Priapulius caudatus</i> Lamarck, 1816                           | P |
| Sipuncula  | <i>Aspidosiphon (Aspidosiphon) muelleri muelleri</i> Diesing, 1851 | D |
| Sipuncula  | <i>Phascolosoma (Phascolosoma) granulatum</i> Leuckart, 1828       | D |
| Sipuncula  | Sipuncula sp.                                                      | D |
| Tunicata   | <i>Ascidia conchilega</i> Müller, 1776                             | S |
| Tunicata   | <i>Ascidia mentula</i> Müller, 1776                                | S |
| Tunicata   | <i>Ascidiella scabra</i> Müller, 1776                              | S |
| Tunicata   | <i>Polycarpa pomaria</i> (Savigny, 1816)                           | S |

\* Five nematode species were assumed to be predominantly predators based on what appeared to be jawed mandibles.
